# Supplementary material for: Improving SERS biosensors for the analysis of ovarian cancer-derived small extracellular vesicles
Source: Royal Society of Chemistry journal article supplement (doi:10.1039/d3an00398a), 2023-01-01
Supplement: d3an00398a1.pdf [file d3an00398a1.pdf]

*Electronic Supplementary Information (ESI):*

**Improving SERS immunoassay for the analysis of ovarian cancer-derived small extracellular vesicles**

Long Ngo, Wei Zhang, Su Su Thae Hnit, and Yuling Wang\*

*School of Natural Sciences; Faculty of Science and Engineering, Macquarie University, Sydney, NSW, 2109, Australia*

\*Corresponding author: [yuling.wang@mq.edu.au](mailto:yuling.wang@mq.edu.au)

**Table S1.** Summarise of capturing agents in different sEV studies using SERS.

| Sources of cancer-derived sEVs | Target capture protein | Ref |
|--------------------------------|------------------------|-----|
| SKBR3, T84, and LNCaP          | CD63                   | [1] |
| SKBR3 and MRC5                 | CD63                   | [2] |
| Panc-1, SW480, and C3          | CD63                   | [3] |
| HepG2                          | CD9                    | [4] |
| Breast cancer plasma           | CD81                   | [5] |

**Table S2.** LOD of other studies using SERS assay for analysing sEVs

| Cancer types                                         | Target molecules          | Capturing molecules | LOD                                                                                                                         | Ref |
|------------------------------------------------------|---------------------------|---------------------|-----------------------------------------------------------------------------------------------------------------------------|-----|
| Prostate cancer                                      | EpCAM                     | CD63                | $1.6 \times 10^{-1}$ particles/ $\mu$ L                                                                                     | [6] |
| Breast cancer and normal lung cells                  | HER2                      | CD63                | $1.2 \times 10^3$ particles/ $\mu$ L                                                                                        | [2] |
| Breast cancer, lung cancer, and prostate cancer      | H2, CEA, PSMA             | CD63                | - Breast cancer: 38 particles/ $\mu$ L<br>- Lung cancer: 73 particles/ $\mu$ L<br>- Prostate cancer: 308 particles/ $\mu$ L | [1] |
| Pancreatic cancer, colorectal cancer, bladder cancer | Glypican-1, EpCAM, CD44v6 | CD63                | $2.3 \times 10^3$ particles/ $\mu$ L                                                                                        | [3] |
| This work: Ovarian cancer                            | CA125, EpCAM, CD24        | CD9                 | $1.5 \times 10^5$ particles/ $\mu$ L                                                                                        |     |

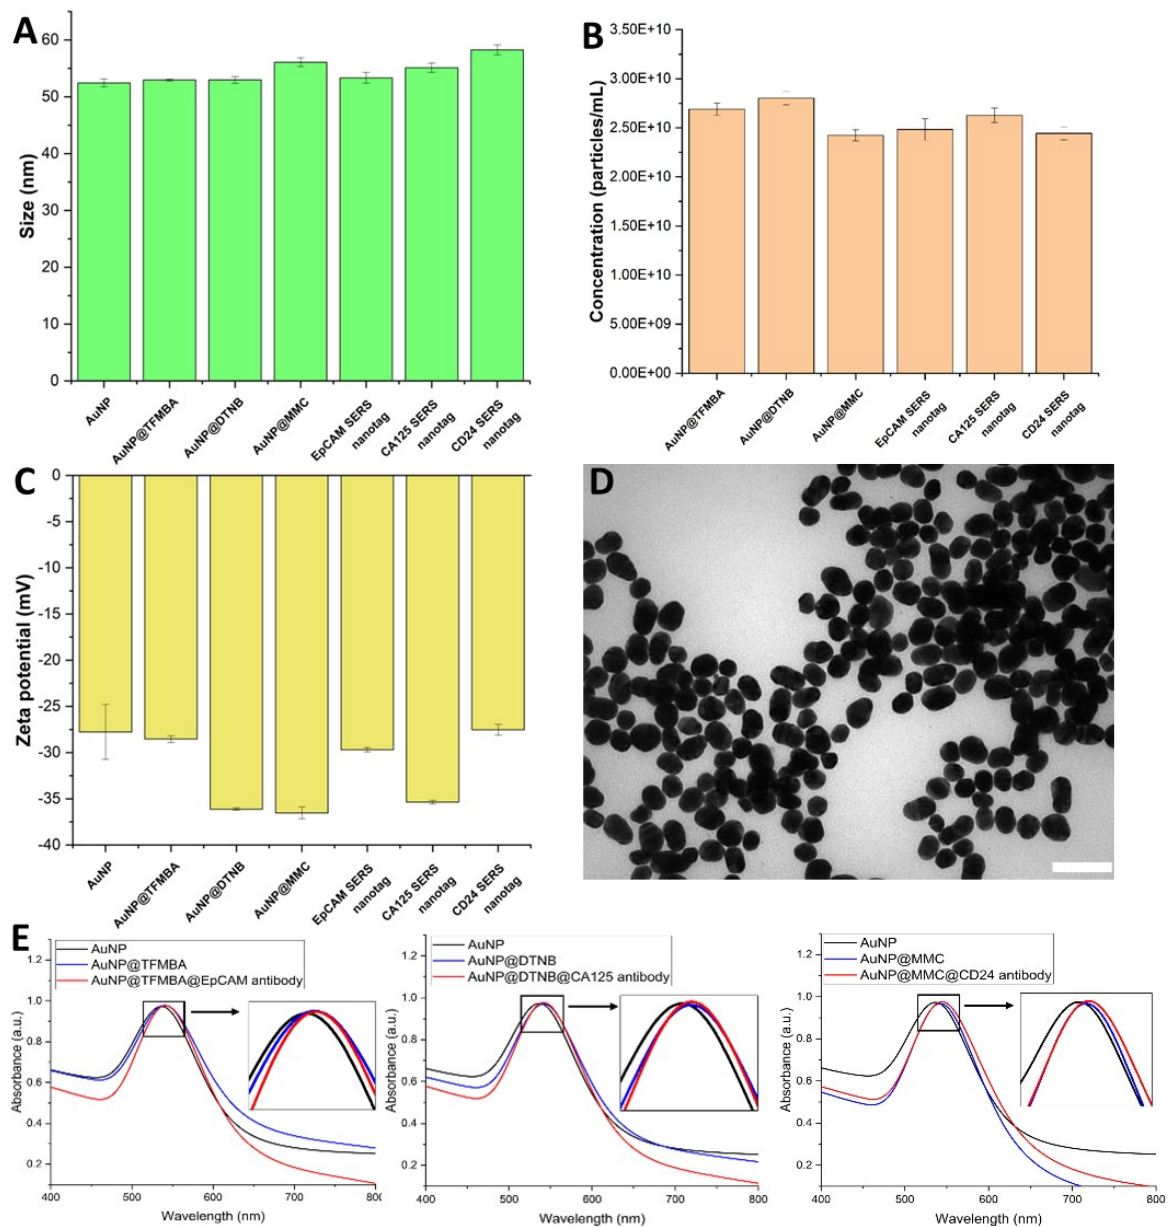

**Figure S1.** Characterisation of AuNPs, AuNPs@Raman molecules and SERS nanotags by A) size (by NTA); B) concentration (NTA); C) zeta-potential (zetasizer); D) TEM image of AuNP (Scale bar 100 nm); E) UV-vis spectra of AuNP, AuNP@Ra, and SERS nanotags.

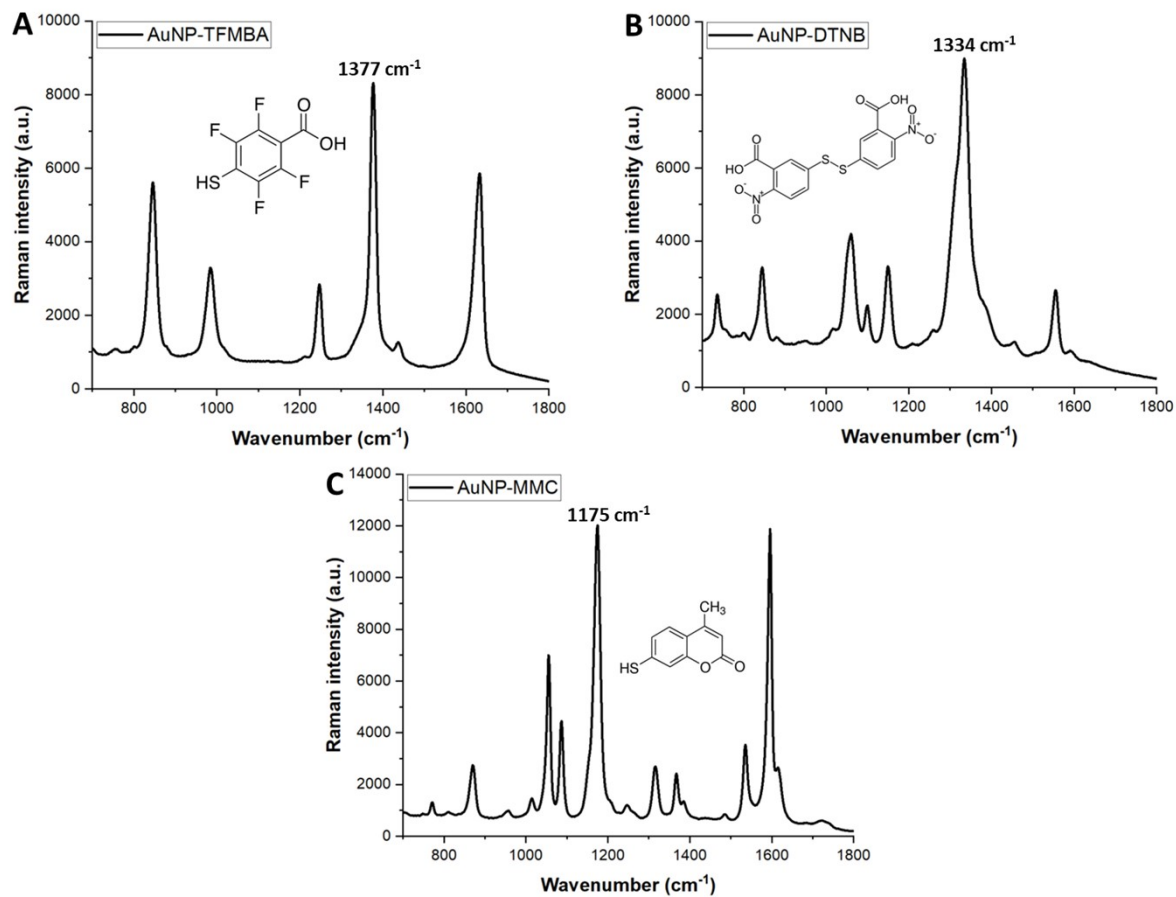

**Figure S2.** Raman spectra and intensity of gold nanoparticle (AuNP) coating with A) TFMBBA Raman molecule, B) DTNB Raman molecules, C) MMC Raman molecules.

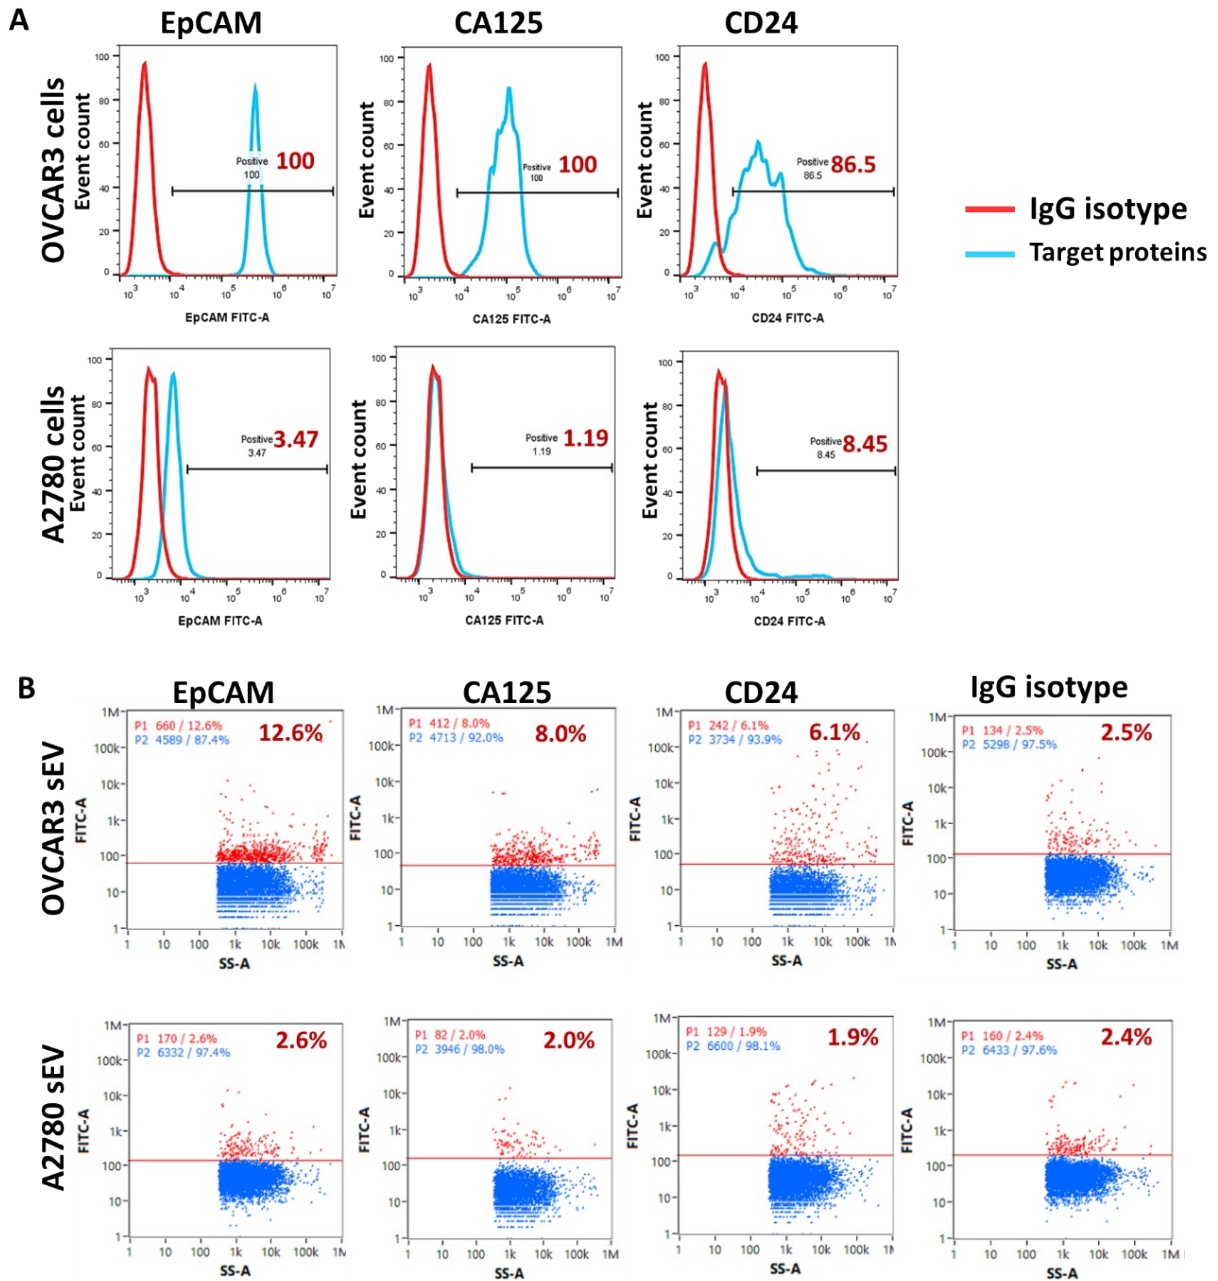

**Figure S3.** The protein expression level of EpCAM, CA125 and CD24 (A) by flow cytometry in OVCAR3 and A2780 cells, and (B) by NanoFCM in sEVs of OVCAR3 and A2780.

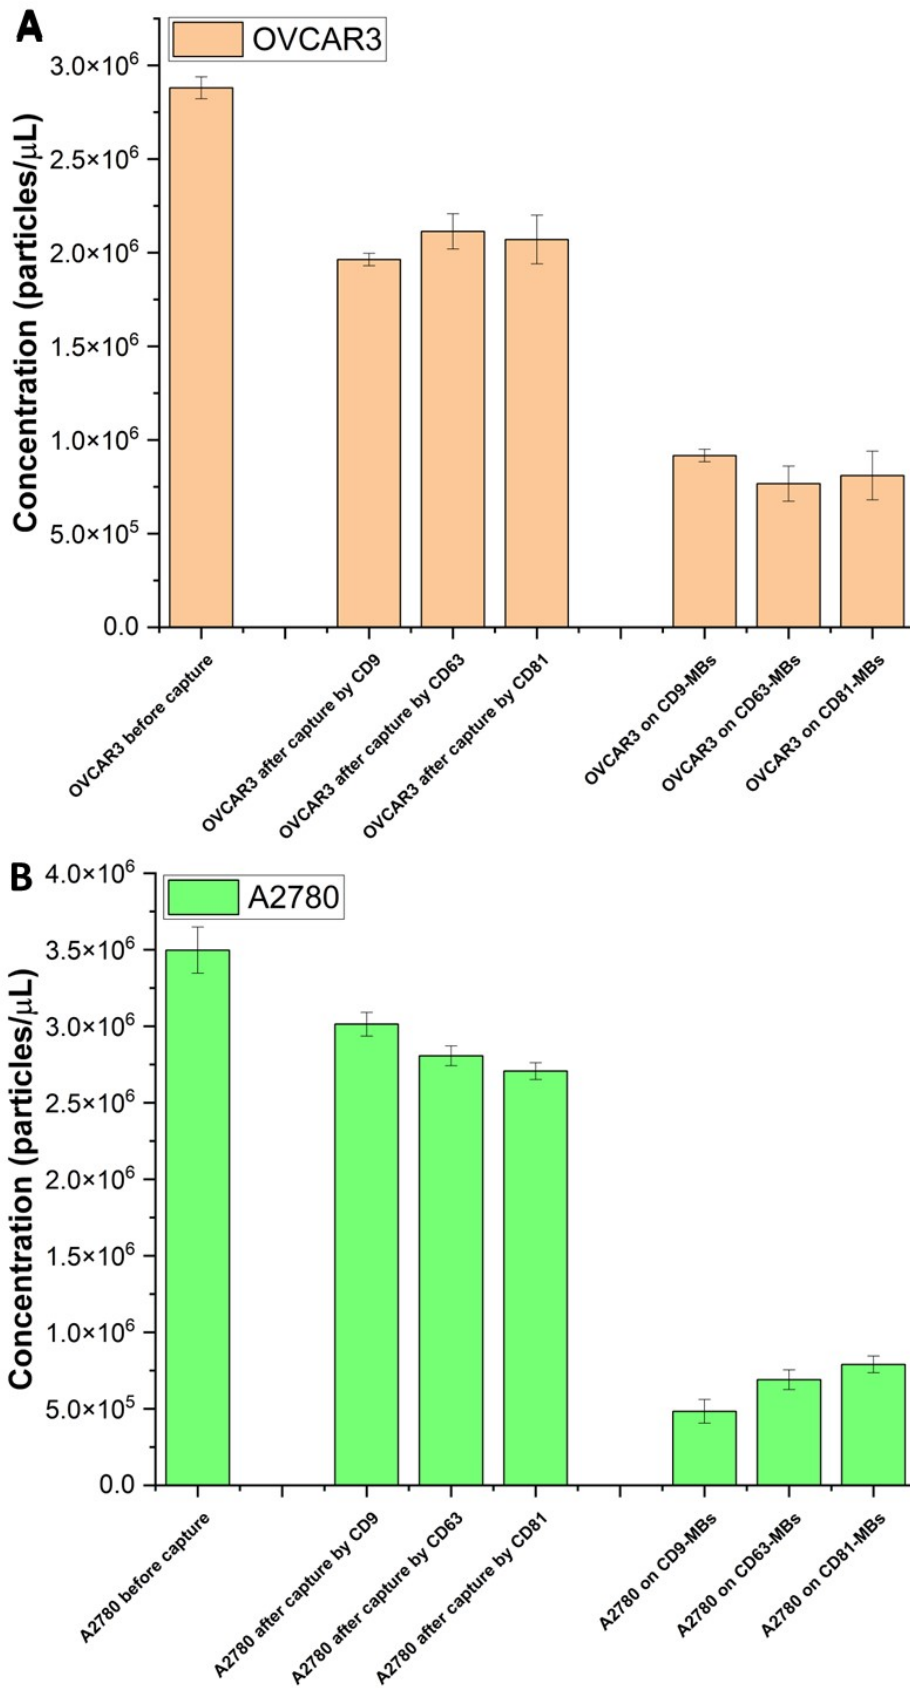

**Figure S4.** sEVs concentration before and after capturing with different MBs. A) OVCAR3-derived sEVs; B) A2780-derived sEVs.

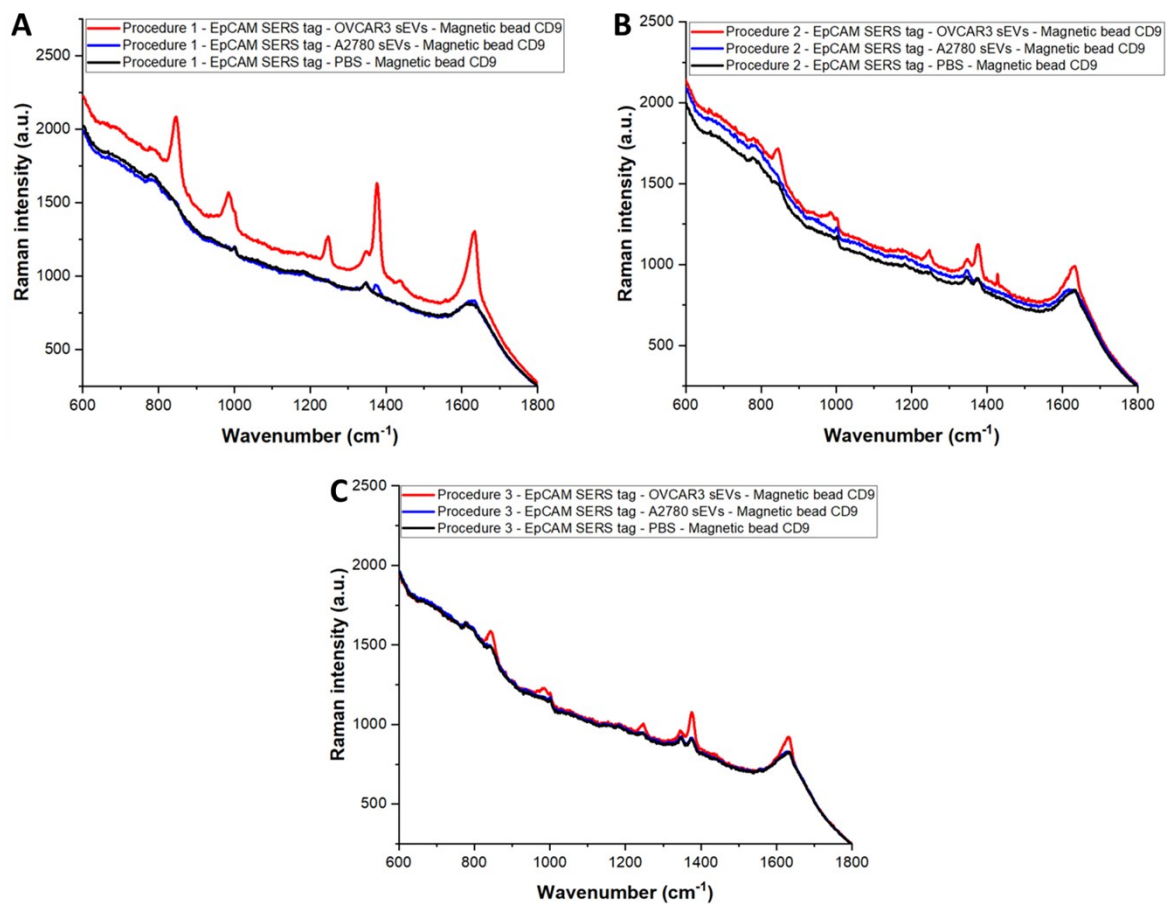

**Figure S5.** Raman spectrum of different immunocomplex forming procedure A) Procedure 1, B) Procedure 2, C) Procedure 3.

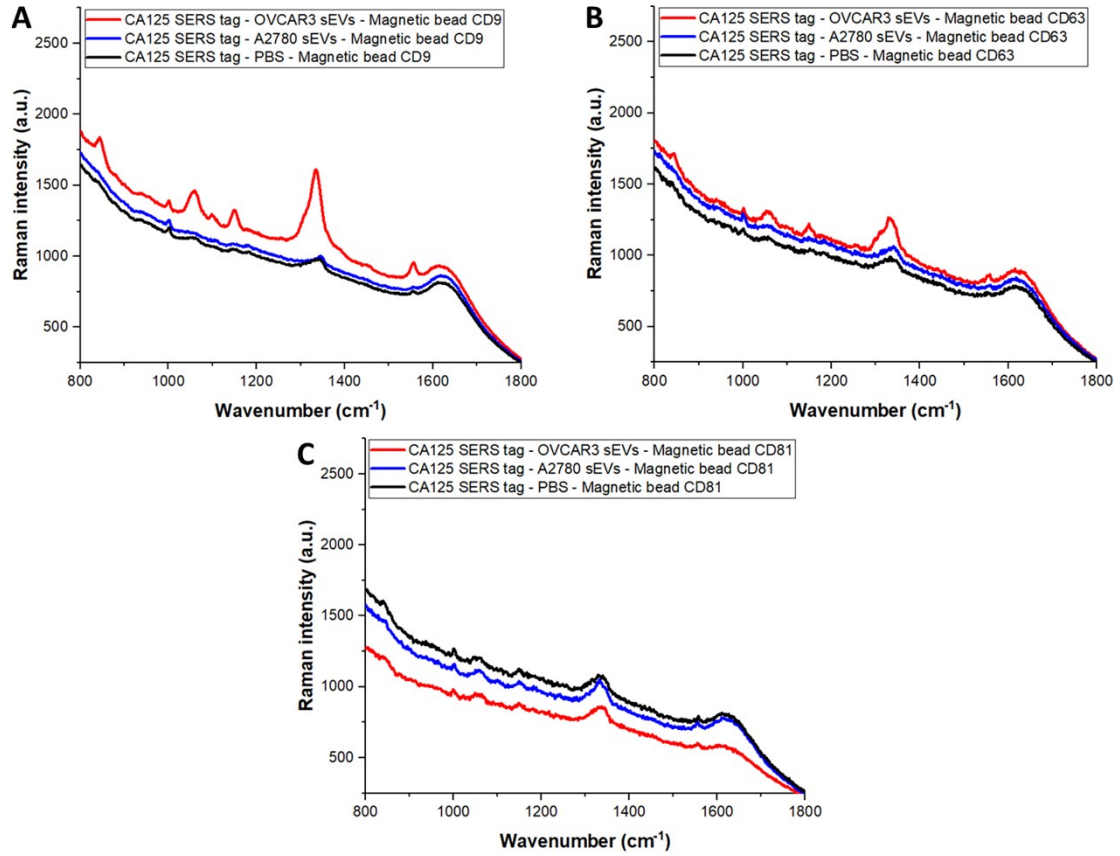

**Figure S6.** Raman spectrum of anti-tetraspanin antibodies efficiency on capturing cancer-derived sEVs using CA125 SERS nanotags. A) Capturing by magnetic beads conjugated with CD9, B) Capturing by magnetic beads conjugated with CD81, C) Capturing by magnetic beads conjugated with CD63.

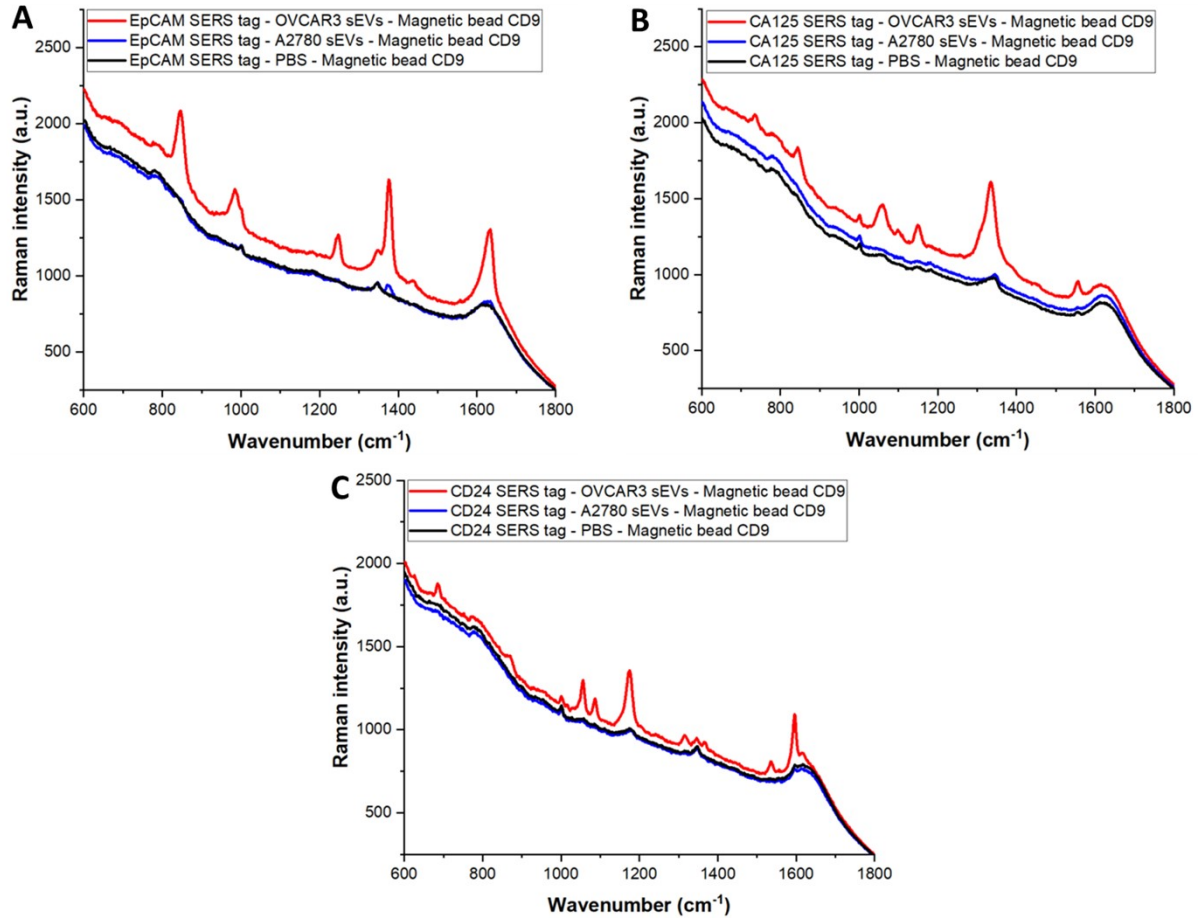

**Figure S7.** Specificity study of three SERS nanotags on profiling three ovarian cancer biomarkers. A) EpCAM, B) CA125, C) CD24.

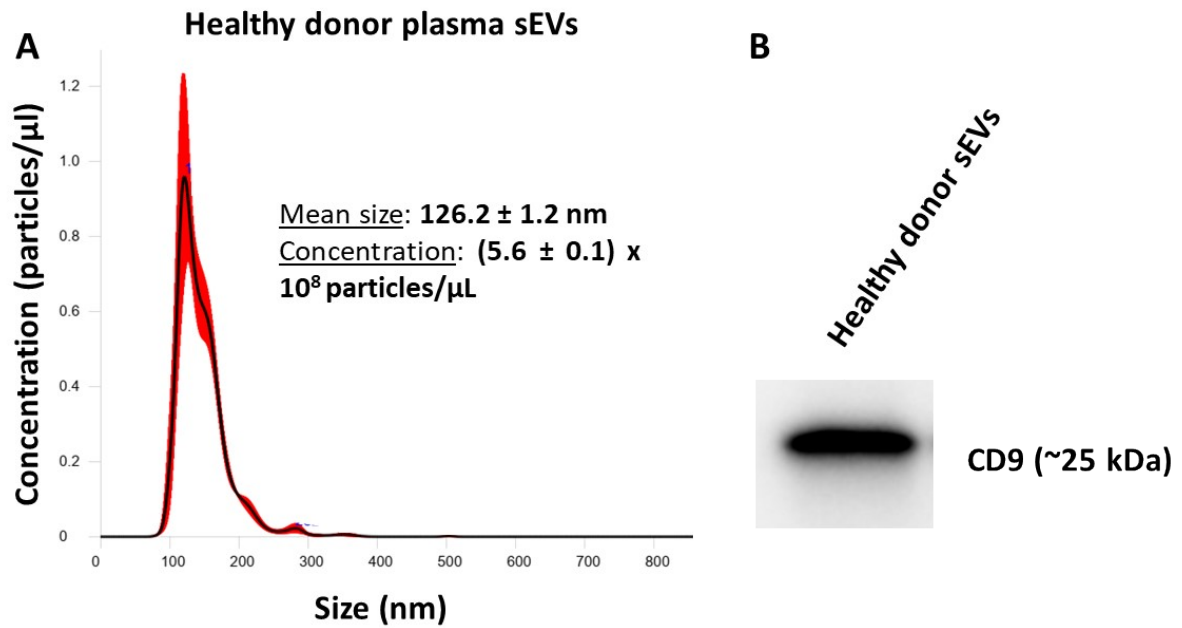

**Figure S8.** Characterisation of healthy donor plasma sEVs. (A) NTA result on the mean size and concentration of plasma's sEVs; (B) Immunoblotting of healthy donor sEVs with CD9 expression.



## References

1. Wang, Z., et al., *Screening and multiple detection of cancer exosomes using an SERS-based method*. *Nanoscale*, 2018. **10**(19): p. 9053-9062.
2. Zong, S., et al., *Facile detection of tumor-derived exosomes using magnetic nanobeads and SERS nanoprobe*. *Analytical Methods*, 2016. **8**(25): p. 5001-5008.
3. Zhang, W., et al., *Enabling Sensitive Phenotypic Profiling of Cancer-Derived Small Extracellular Vesicles Using Surface-Enhanced Raman Spectroscopy Nanotags*. *ACS Sensors*, 2020. **5**(3): p. 764-771.
4. Tian, Y.-F., et al., *Highly sensitive detection of exosomes by SERS using gold nanostar@Raman reporter@nanoshell structures modified with a bivalent cholesterol-labeled DNA anchor*. *Analyst*, 2018. **143**(20): p. 4915-4922.
5. Amrhein, K., et al., *Dual Imaging Single Vesicle Surface Protein Profiling and Early Cancer Detection*. *ACS Applied Materials & Interfaces*, 2023. **15**(2): p. 2679-2692.
6. Wang, Y., et al., *Microfluidic Raman biochip detection of exosomes: a promising tool for prostate cancer diagnosis*. *Lab on a Chip*, 2020. **20**(24): p. 4632-4637.
